# Supplementary material for: diTFPP, a Phenoxyphenol, Sensitizes Hepatocellular Carcinoma Cells to C2-Ceramide-Induced Autophagic Stress by Increasing Oxidative Stress and ER Stress Accompanied by LAMP2 Hypoglycosylation
Source: MDPI journal article supplement (doi:10.3390/cancers14102528), 2022-05-20

| PreMW (kDa) | -   | +   | -   | +   | -   | +   | C <sub>2</sub> -cer<br>diTFPP (μM) |
|-------------|-----|-----|-----|-----|-----|-----|------------------------------------|
|             | -   | -   | 5   | 5   | 10  | 10  |                                    |
|             |     |     |     |     |     |     |                                    |
| CERS 2      |     |     |     |     |     |     |                                    |
|             | 1.0 | 2.0 | 1.2 | 0.9 | 2.1 | 0.6 | Fold                               |

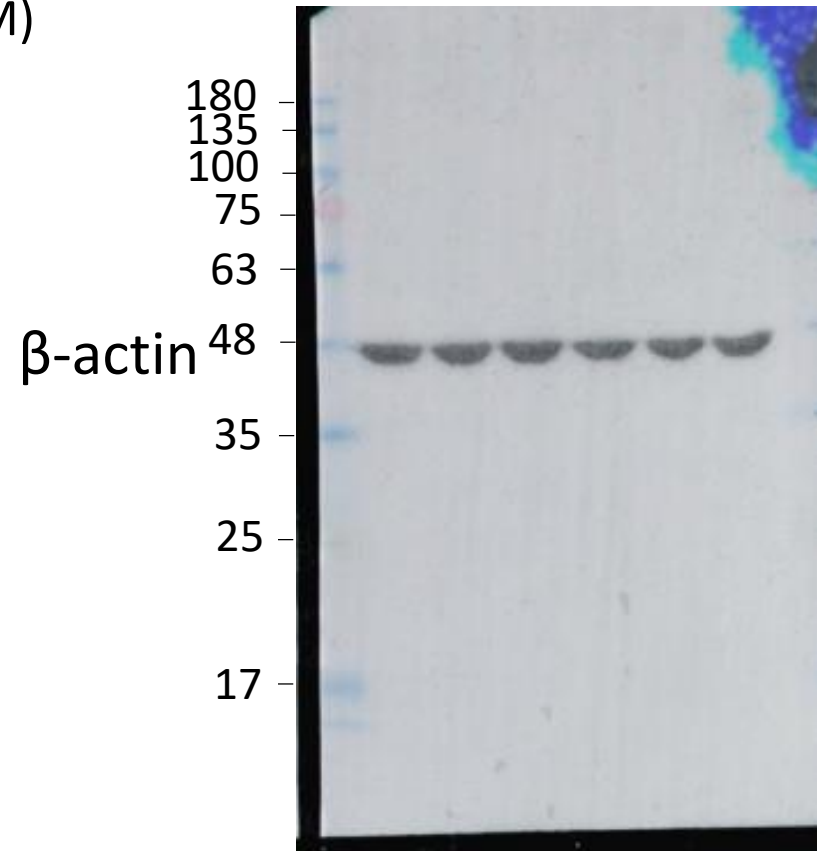

Figure 3

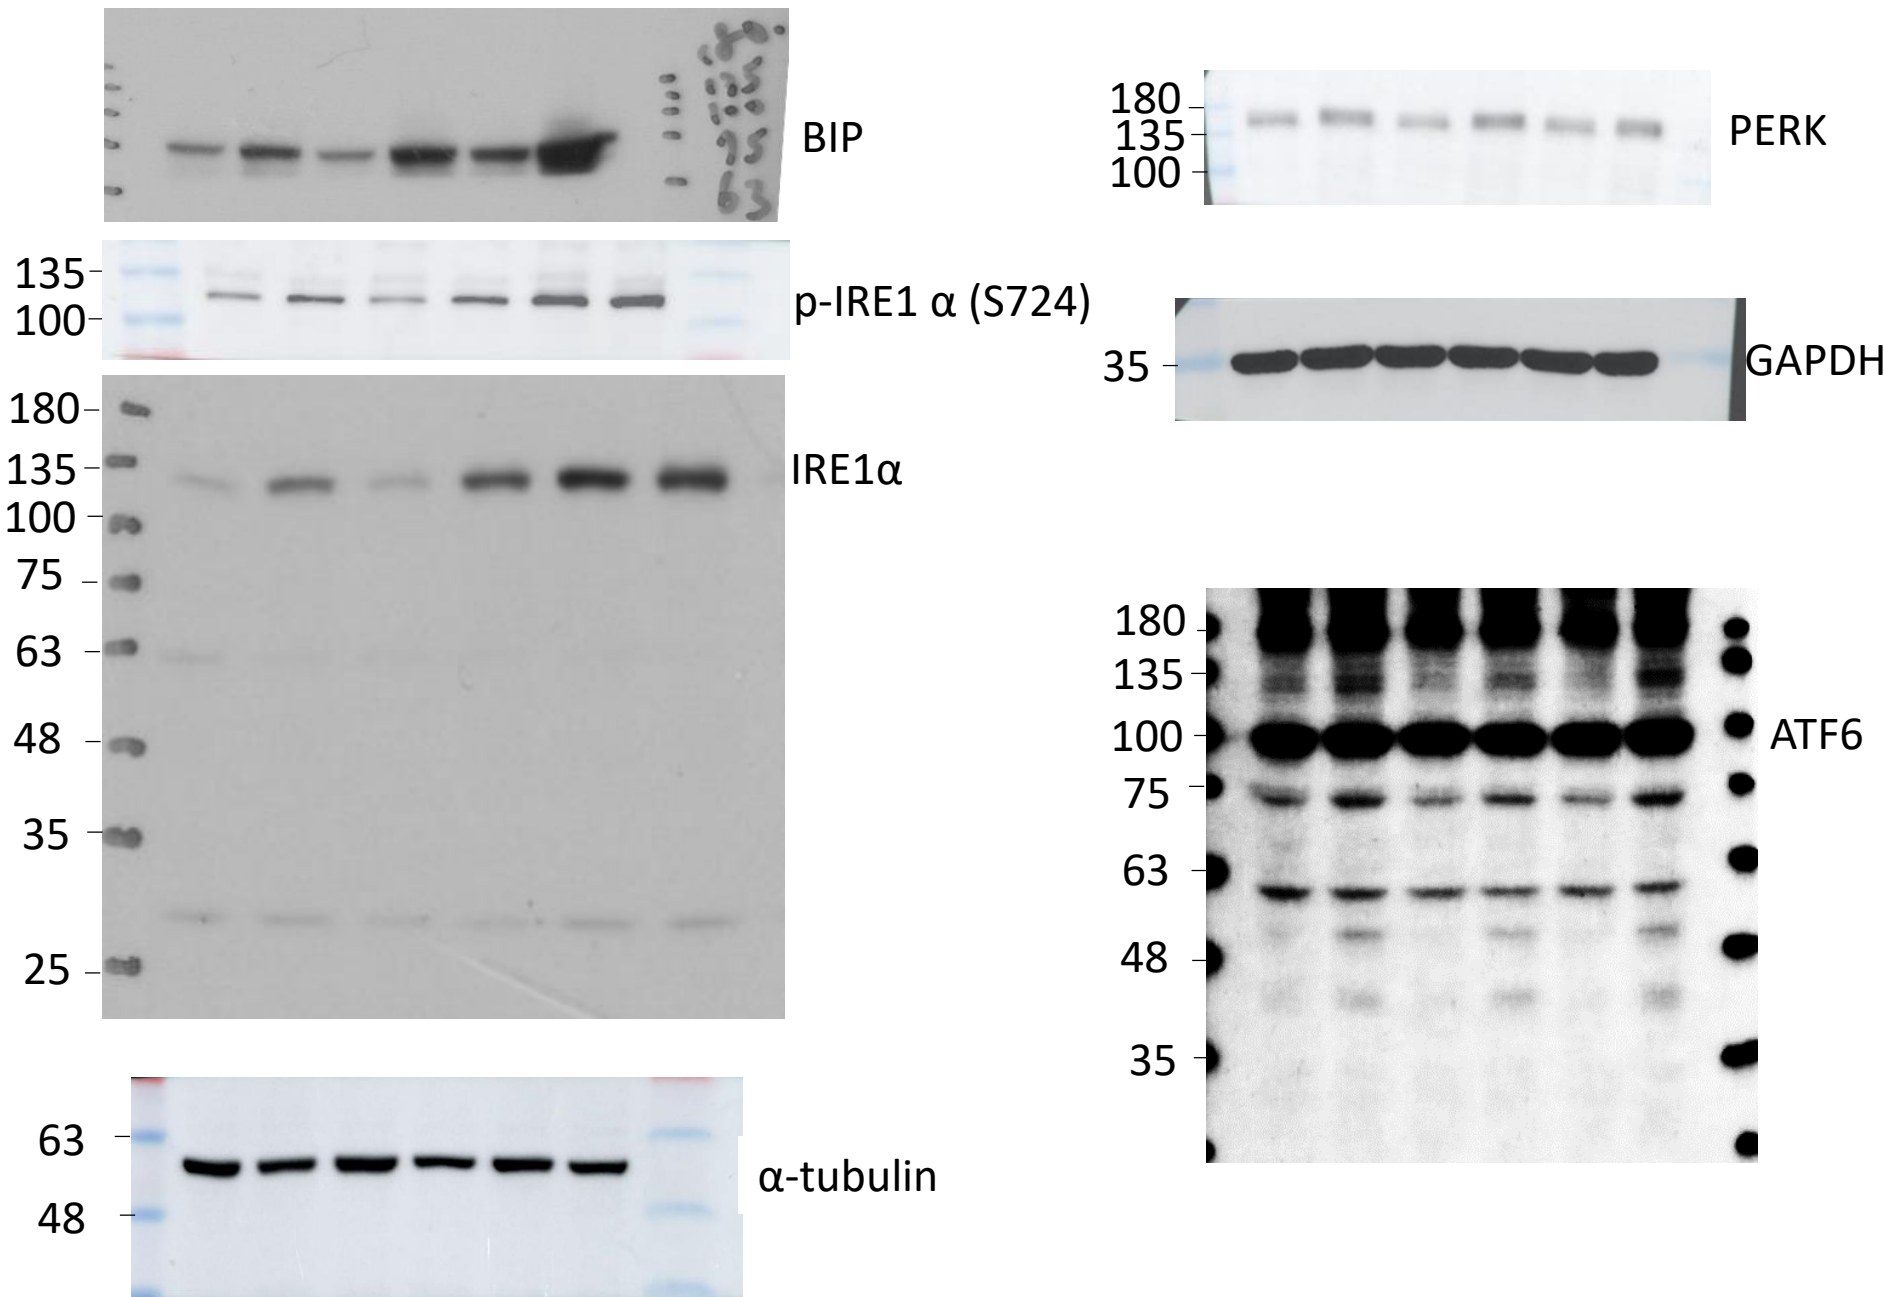

Figure 3-continue

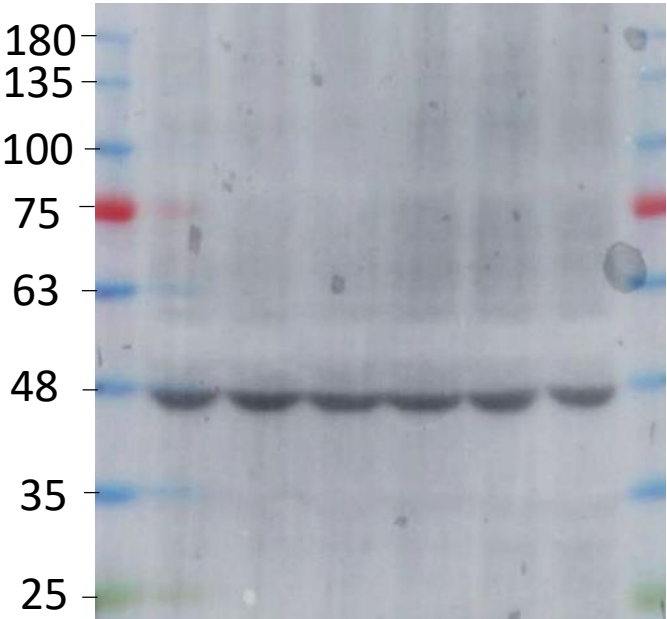

$\beta$ -actin

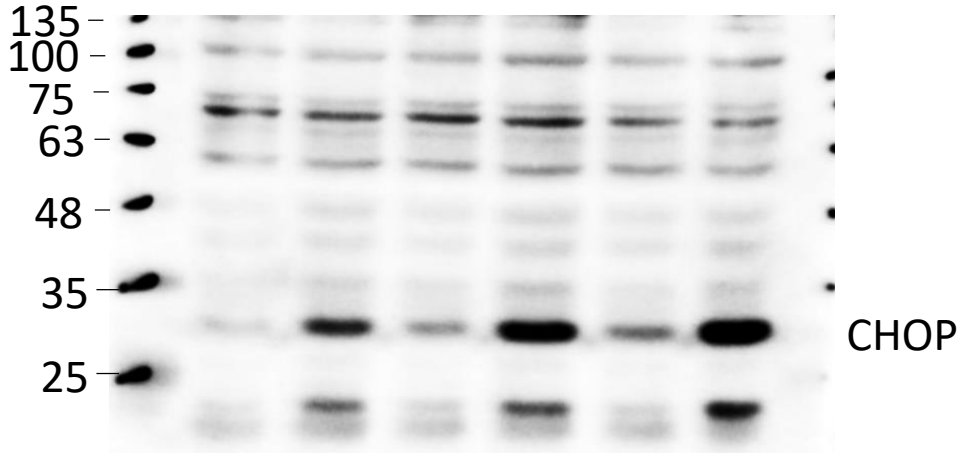

GAPDH

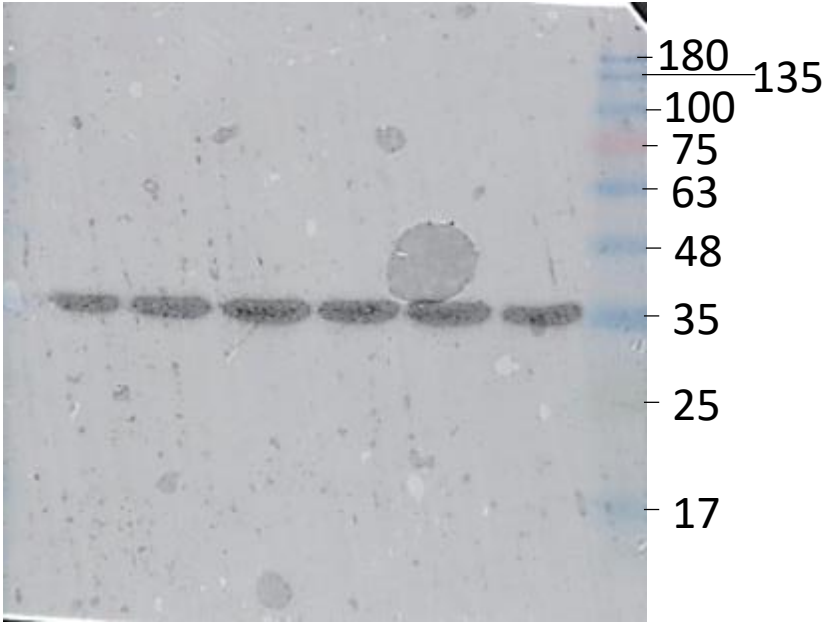

Figure 4

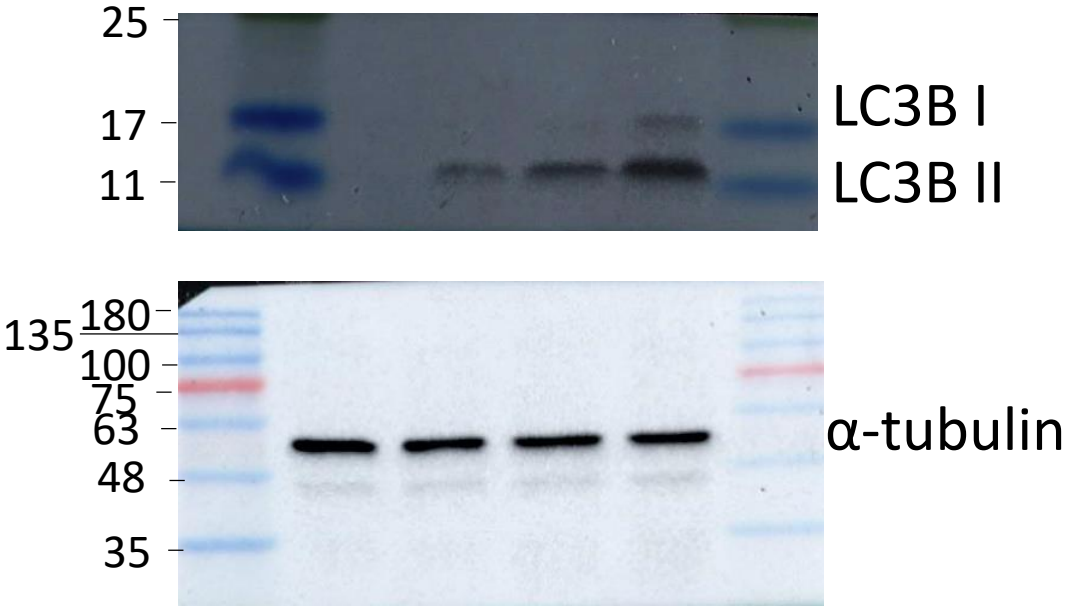

Figure 5

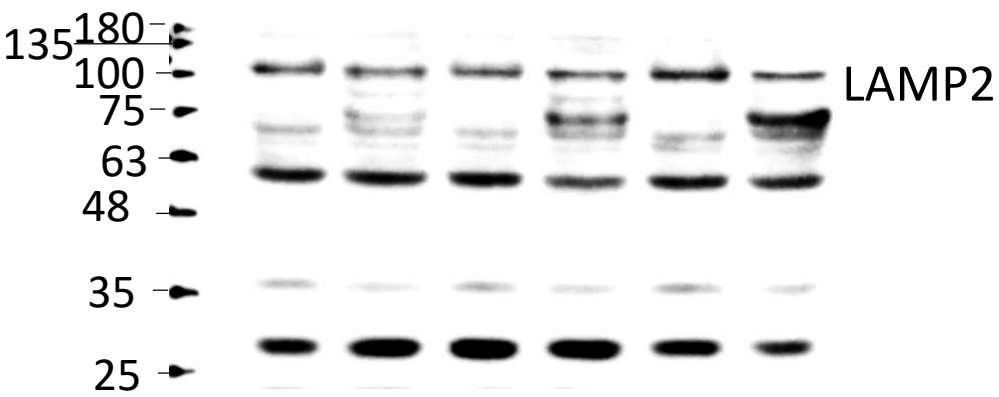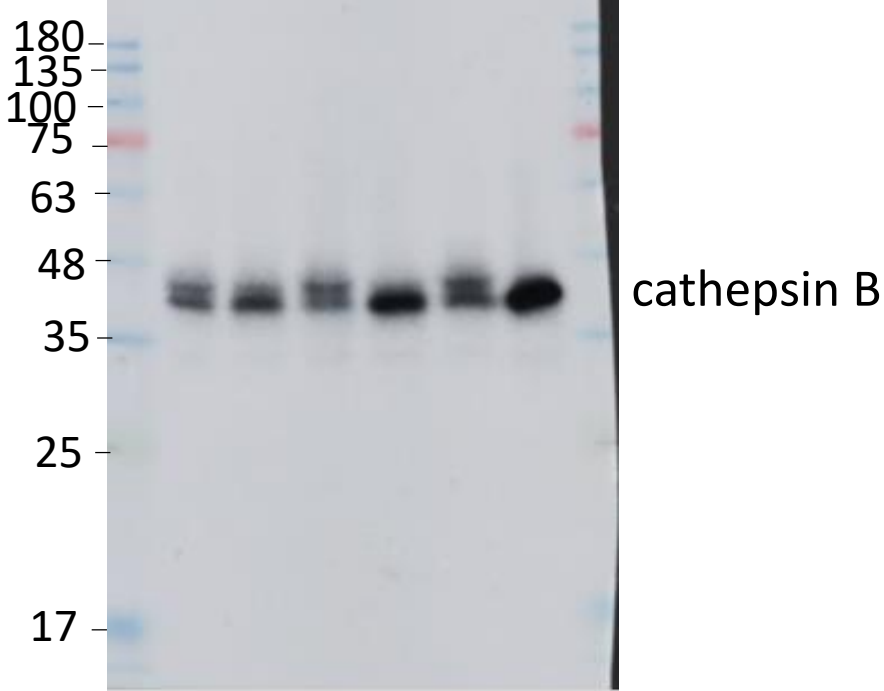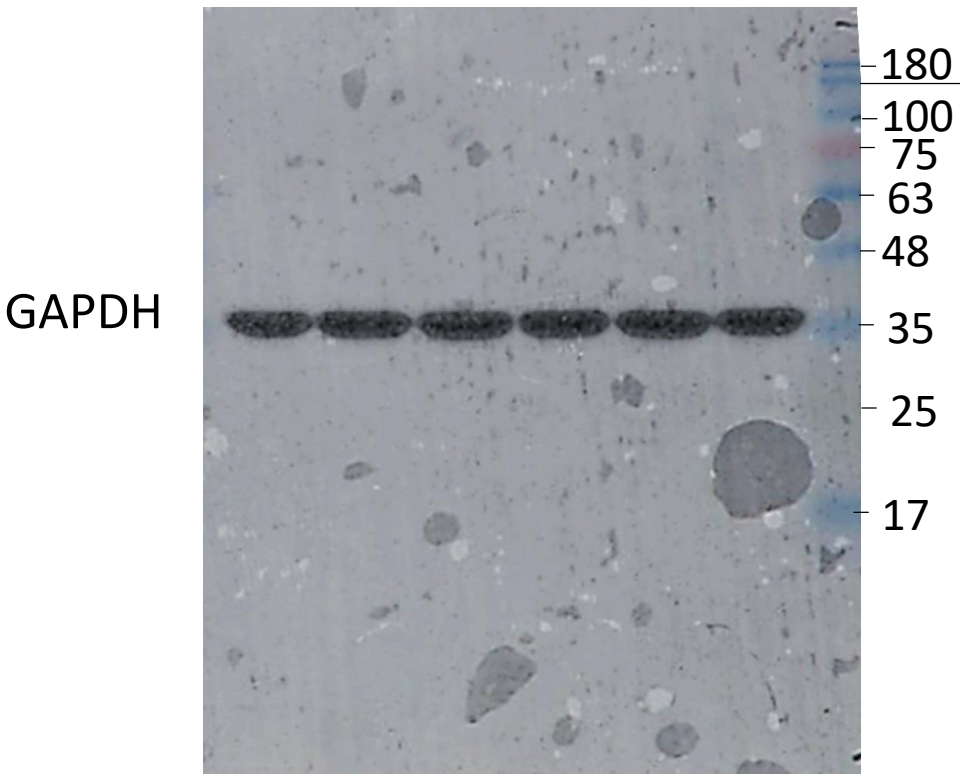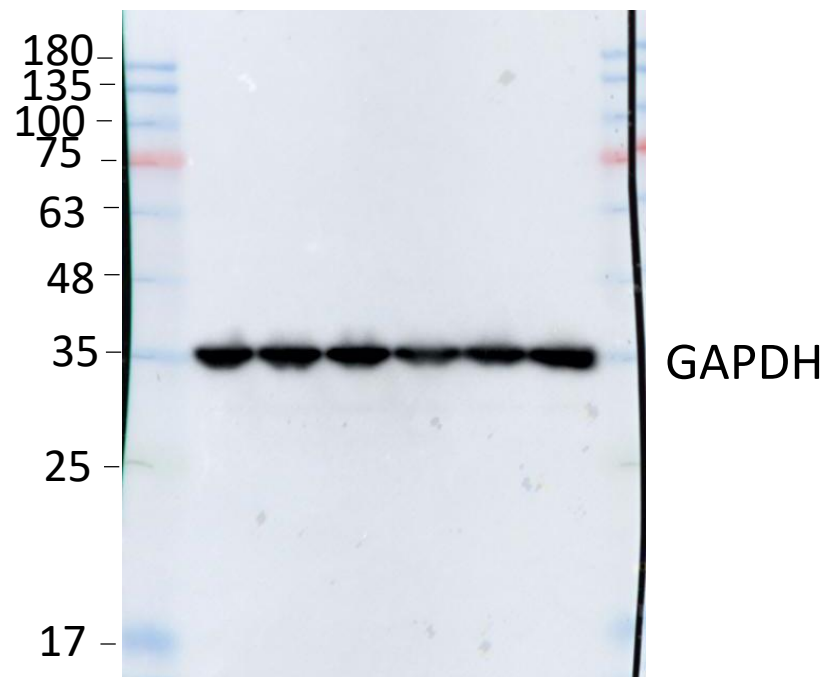

Figure 5-continue

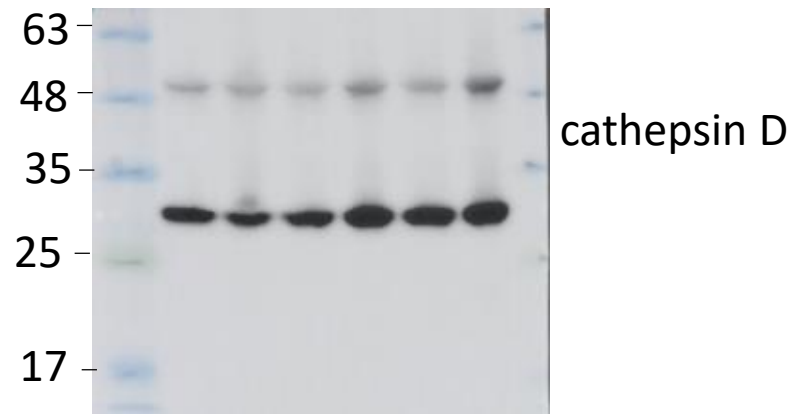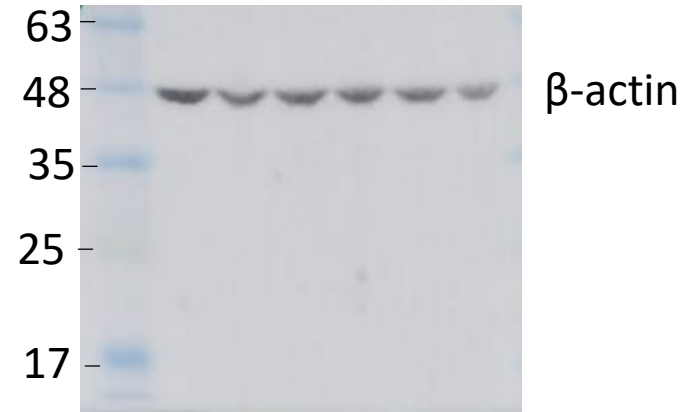

Figure 6A

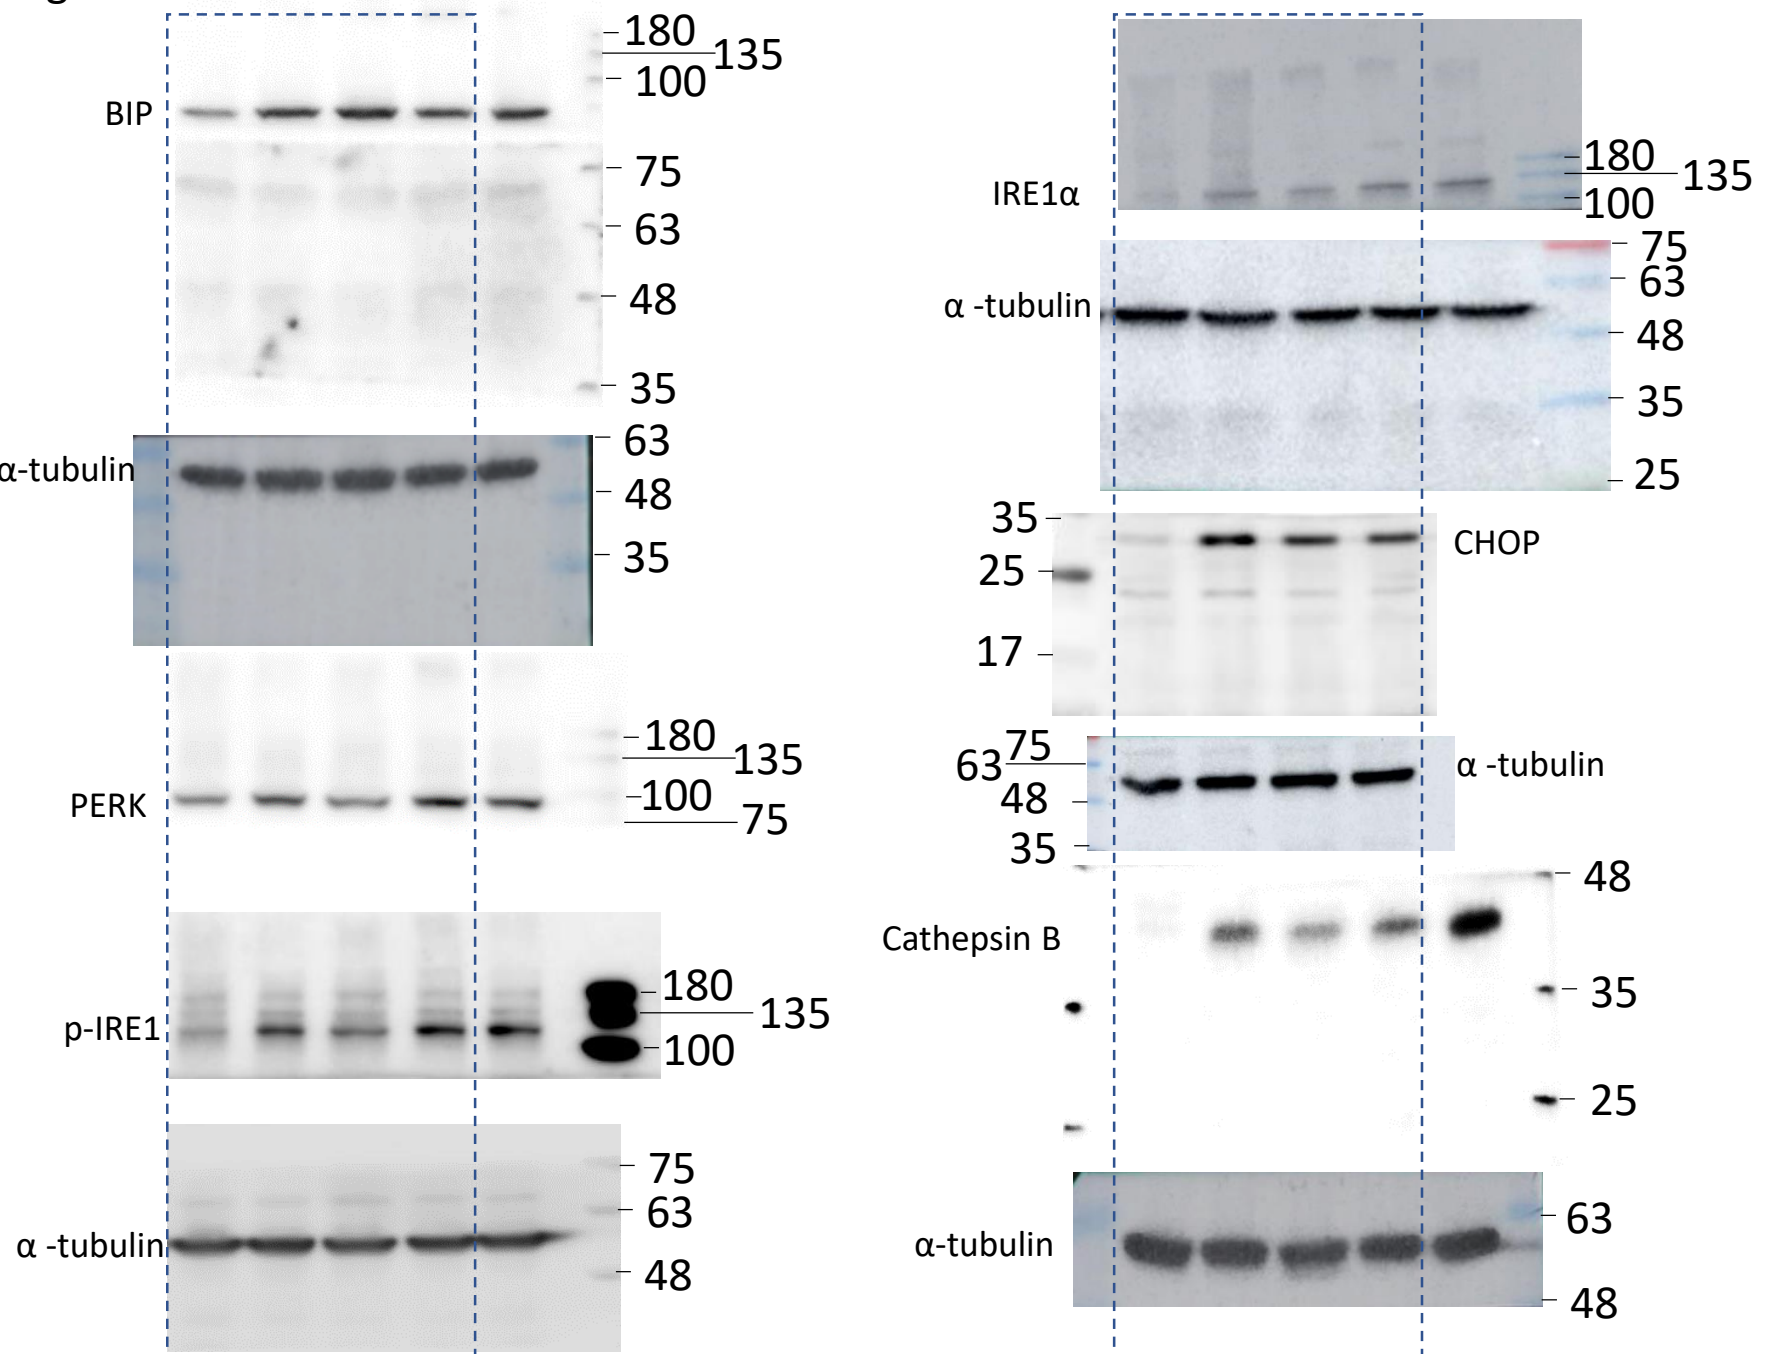

Figure 6B

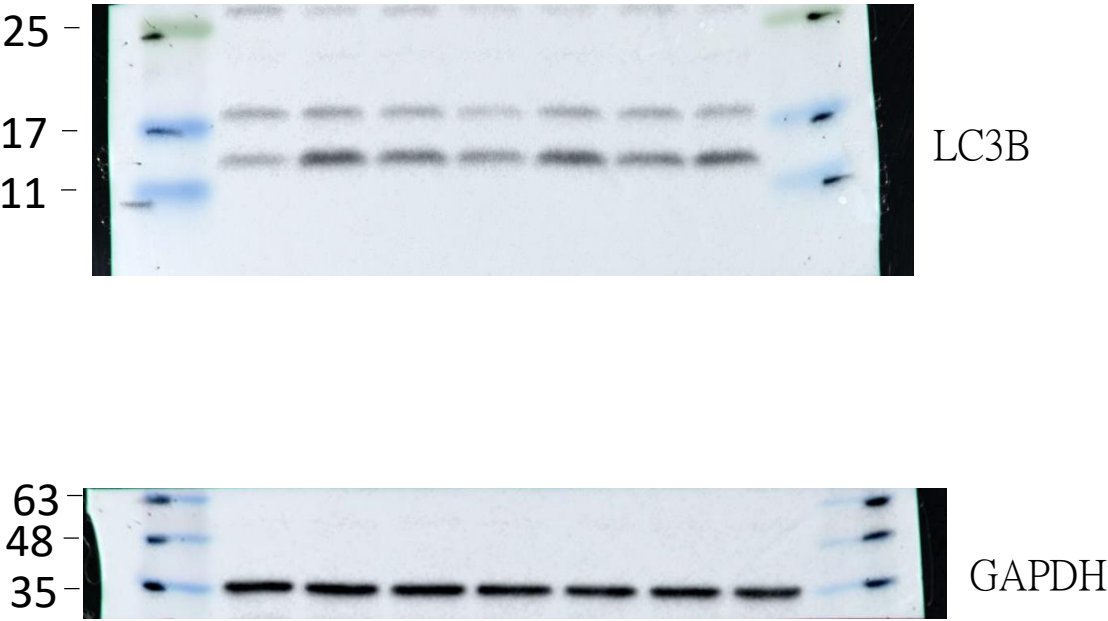



Figure S2

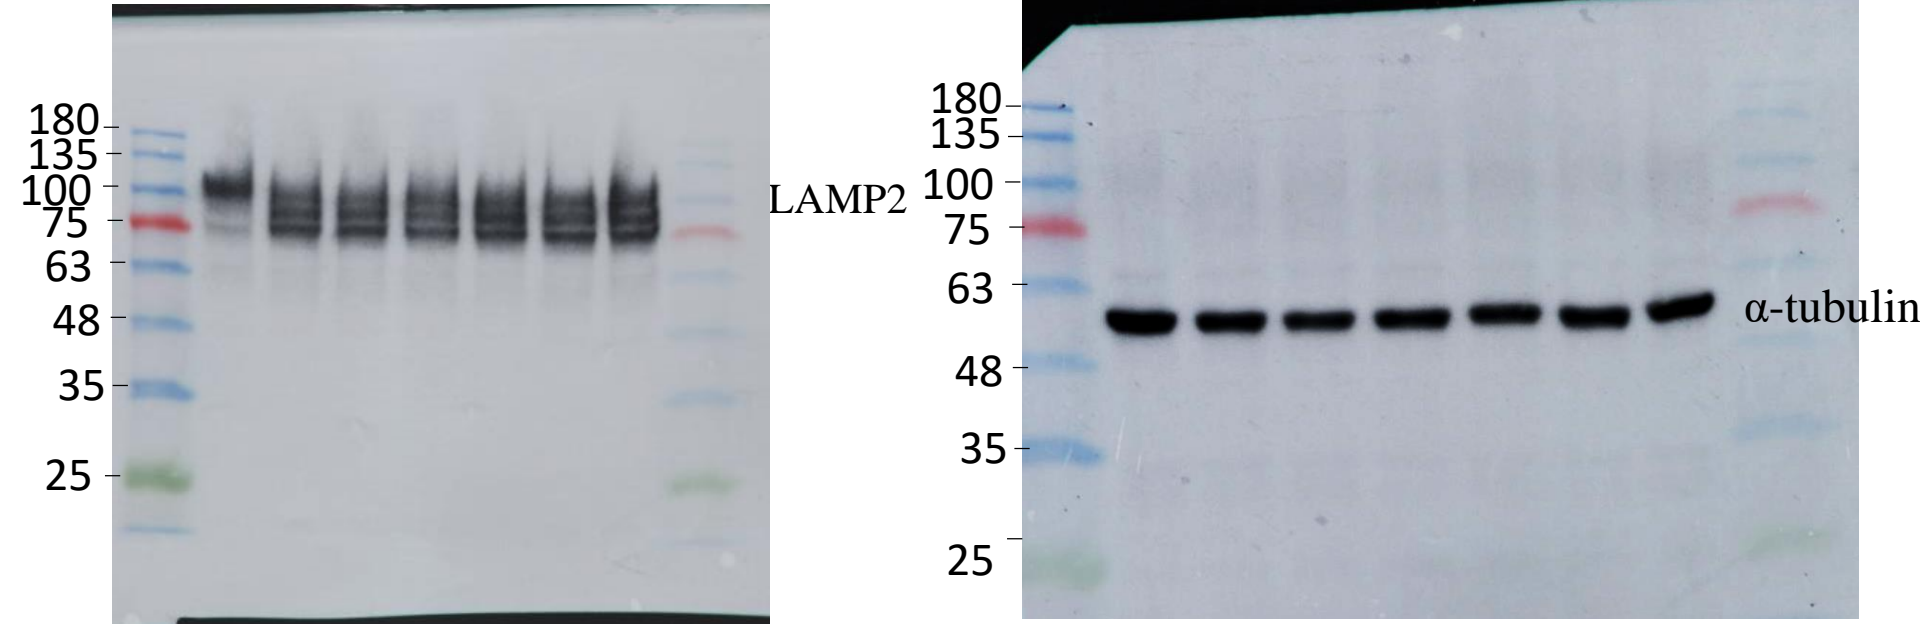

Supplement: s1 [file s1]
