# Supplementary material for: diTFPP, a Phenoxyphenol, Sensitizes Hepatocellular Carcinoma Cells to C2-Ceramide-Induced Autophagic Stress by Increasing Oxidative Stress and ER Stress Accompanied by LAMP2 Hypoglycosylation
Source: MDPI journal article supplement (doi:10.3390/cancers14102528), 2022-05-20
Supplement: s1 [file s1]

## Figure S1

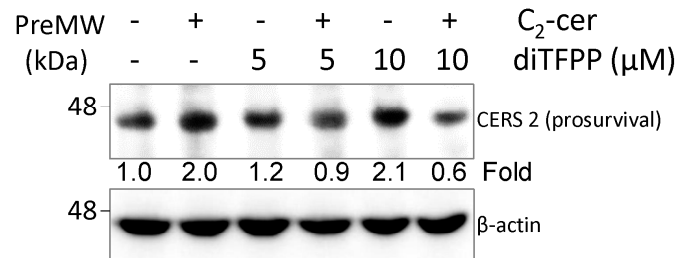

**Figure S1.** Effect of diTFPP on the level of the sphingolipid metabolic enzyme CERS2. C<sub>2</sub>-ceramide treatment alone upregulated the prosurvival sphingolipid metabolic enzyme CERS2, whereas diTFPP/C<sub>2</sub>-ceramide cotreatment dramatically decreased the protein level of CERS2. β-Actin was used as the internal control. PreMW: prestained protein molecular weight marker (see Section 2.4).

**Figure S2**

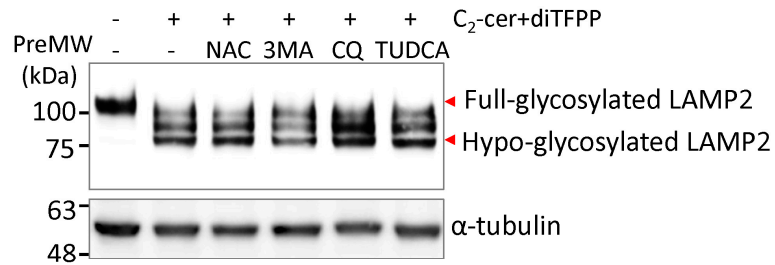

**Figure S2.** Effect of ROS scavengers, autophagy and ER stress inhibitors on HCC cells treated with ceramide and diTFPP. HCC cells were pretreated with the ROS scavenger NAC, autophagy inhibitors 3-MA and CQ, and ER stress inhibitor TUDCA for 6 h. The protein level of LAMP2 was measured after cells were treated with diTFPP/C<sub>2</sub>-ceramide for 24 h.  $\alpha$ -Tubulin was used as the internal control. The bands with a high molecular mass (above 75 to 100 kDa) indicate glycosylated LAMP2. The band with a low molecular mass (approximately 75 kDa) indicates un or hypoglycosylated LAMP2.  $\alpha$ -Tubulin was used as the internal control. PreMW: prestained protein molecular weight marker (see Section 2.4).
